# Supplementary material
Source: publisher figshare collection journal article supplement (https://future-science-group.figshare.com/articles/dataset/_/23942544)
Supplement: Supplementary file 1 [file 1]

# **Supplementary table 1**

| **Topic** | **Count** | **Name** |
| --- | --- | --- |
| -1 | 16326 | -1_implant_implants_bone_titanium |
| 0 | 783 | 0_mesenchymal_mesenchymal stem_mesenchymal stem cells_human mesenchymal |
| 1 | 754 | 1_hydroxyapatite_nano hydroxyapatite_hydroxyapatite scaffolds_nano |
| 2 | 739 | 2_glass_bioactive glass_bioactive_mesoporous |
| 3 | 736 | 3_sinus_floor_maxillary_elevation |
| 4 | 631 | 4_hydrogels_hydrogel_injectable_hydrogels bone |
| 5 | 548 | 5_fracture_fracture healing_osteoclastogenesis_osteoporosis |
| 6 | 537 | 6_adipose_adipose derived_adipose derived stem_human adipose |
| 7 | 507 | 7_platelet_platelet rich_rich_rich fibrin |
| 8 | 496 | 8_morphogenetic_bone morphogenetic_bmp_morphogenetic proteins |
| 9 | 435 | 9_electrospun_nanofibers_fibers_nanofibrous |
| 10 | 409 | 10_3d_printed_3d printed_printing |
| 11 | 351 | 11_periodontal ligament_ligament_periodontal ligament stem_ligament stem |
| 12 | 340 | 12_growth_growth factor_growth factors_factor |
| 13 | 326 | 13_spinal_cord_injury_recovery |
| 14 | 319 | 14_alveolar_alveolar ridge_ridge_ridge preservation |
| 15 | 312 | 15_fusion_spinal fusion_lumbar_spine |
| 16 | 287 | 16_craniofacial_cranial_craniofacial bone_cranial defects |
| 17 | 284 | 17_silk_silk fibroin_fibroin_scaffolds |
| 18 | 283 | 18_cement_phosphate cement_cements_calcium phosphate cement |
| 19 | 275 | 19_membranes_guided_guided bone_guided bone regeneration |
| 20 | 275 | 20_liver_hepatic_fibrosis_hepatocyte |
| 21 | 273 | 21_muscle_skeletal muscle_skeletal_muscle regeneration |
| 22 | 260 | 22_titanium_titanium implants_titanium implant_osseointegration |
| 23 | 254 | 23_pulp_dental pulp_pulp stem_dental pulp stem |
| 24 | 252 | 24_osseointegration_implant osseointegration_drilling_implant |
| 25 | 239 | 25_endothelial_endothelial progenitor_endothelial progenitor cells_progenitor |
| 26 | 236 | 26_tendon_tendon bone_tendon healing_bone tendon |
| 27 | 231 | 27_chitosan_chitosan based_chitosan scaffolds_bone tissue engineering |
| 28 | 228 | 28_scaffolds bone_scaffolds_bone tissue engineering_scaffold |
| 29 | 228 | 29_ridge augmentation_ridge_augmentation_vertical |
| 30 | 227 | 30_hydroxyapatite coated_hydroxyapatite_coated_hydroxyapatite coating |
| 31 | 225 | 31_periodontitis_periodontal_aggressive periodontitis_aggressive |
| 32 | 215 | 32_calvaria_calvarial_rat calvaria_calvarial defects |
| 33 | 215 | 33_ultrasound_low intensity_intensity_pulsed |
| 34 | 211 | 34_chondrogenic_chondrogenic differentiation_chondrogenesis_chondrocytes |
| 35 | 209 | 35_enamel_enamel matrix_derivative_enamel matrix derivative |
| 36 | 208 | 36_periosteum_periosteal_periosteum derived_pericytes |
| 37 | 205 | 37_nerve_peripheral_schwann_schwann cells |
| 38 | 204 | 38_myocardial_heart_cardiac_bone marrow cells |
| 39 | 203 | 39_renal_kidney_acute_tubular |
| 40 | 201 | 40_stem cell derived_cell derived_derived_promote |
| 41 | 200 | 41_calcium phosphate_calcium_phosphate_ceramics |
| 42 | 187 | 42_skin_wound_wound healing_wounds |
| 43 | 181 | 43_magnesium_mg_alloy_degradation |
| 44 | 181 | 44_hip_hip arthroplasty_total hip_arthroplasty |
| 45 | 178 | 45_osseointegrated_amputation_prostheses_prosthesis |
| 46 | 175 | 46_graphene_graphene oxide_oxide_reduced |
| 47 | 168 | 47_titanium_implants_piece_surface |
| 48 | 168 | 48_hematopoietic_hematopoietic stem_hematopoietic stem cells_hematopoietic stem cell |
| 49 | 164 | 49_sockets_extraction sockets_extraction_socket |
| 50 | 163 | 50_dogs_study dogs_dog_experimental study dogs |
| 51 | 162 | 51_cardiac_myocardial_mesenchymal stem cells_mesenchymal stem |
| 52 | 158 | 52_mir_microrna_targeting_21 |
| 53 | 158 | 53_diabetes_type diabetes_diabetic_diabetes mellitus |
| 54 | 157 | 54_skeletal stem_skeletal stem cells_skeletal_stem cells bone |
| 55 | 154 | 55_polycaprolactone_caprolactone_epsilon_epsilon caprolactone |
| 56 | 151 | 56_cartilage_cartilage regeneration_articular_articular cartilage |
| 57 | 151 | 57_zebrafish_regenerating_bmp signaling_skeletal |
| 58 | 148 | 58_peri implantitis_implantitis_peri_surgical |
| 59 | 146 | 59_cartilage_articular cartilage_articular_cartilage repair |
| 60 | 146 | 60_distraction_distraction osteogenesis_osteogenesis_consolidation |
| 61 | 144 | 61_lung_epithelial_fibrosis_epithelium |
| 62 | 142 | 62_cardiac_heart_cardiovascular_stem cell therapy |
| 63 | 140 | 63_laser_low level_level laser_low level laser |
| 64 | 140 | 64_edentulous_immediate_maxilla_loading |
| 65 | 138 | 65_radiation_irradiation_syndrome_hematopoietic |
| 66 | 136 | 66_ligament_anterior_reconstruction_tendon |
| 67 | 133 | 67_bone graft_graft_substitutes_graft substitutes |
| 68 | 133 | 68_irradiated_radiation_irradiation_cancer |
| 69 | 131 | 69_bone healing_defect model_healing_healing model |
| 70 | 131 | 70_porous titanium_ti6al4v_porous_ti |
| 71 | 130 | 71_intestinal_epithelial_mucosal_epithelium |
| 72 | 129 | 72_neural_neuronal_neurotrophic_nervous |
| 73 | 129 | 73_distraction_distraction osteogenesis_transport_mandibular distraction |
| 74 | 128 | 74_aid_osseointegrated_complications_wide |
| 75 | 126 | 75_hormone_parathyroid hormone_parathyroid_intermittent |
| 76 | 123 | 76_gene therapy_gene_gene delivery_therapy bone |
| 77 | 119 | 77_periodontal tissue_periodontal_periodontal regeneration_periodontal tissue regeneration |
| 78 | 116 | 78_vesicles_extracellular vesicles_extracellular_derived extracellular vesicles |
| 79 | 114 | 79_tendon_tendon bone_suture_tendon bone healing |
| 80 | 114 | 80_adult stem_adult stem cells_adult_stem cell |
| 81 | 113 | 81_intrabony_intrabony defects_infrabony_infrabony defects |
| 82 | 111 | 82_strontium_silicate_osteoporotic_bioceramic |
| 83 | 107 | 83_vascularized_vascularized bone_vascularization_engineered bone |
| 84 | 107 | 84_nanotechnology_nanoparticles bone_nanoparticles_nanomaterials |
| 85 | 107 | 85_frequency_resonance_stability_implant stability |
| 86 | 106 | 86_porous_porous scaffolds_porous scaffold_pore |
| 87 | 106 | 87_brain_ischemic_ischemia_cell transplantation |
| 88 | 106 | 88_alginate_hydrogels_beads_gelatin |
| 89 | 106 | 89_arthritis_rheumatoid_osteoarthritis_rheumatoid arthritis |
| 90 | 103 | 90_liver_hepatic_mesenchymal stem_fibrosis |
| 91 | 103 | 91_magnetic_fe_field_static |
| 92 | 102 | 92_apatite_carbonate_nanocomposites_poly |
| 93 | 102 | 93_bone tissue engineering_tissue engineering_engineering_engineering bone |
| 94 | 101 | 94_osteomyelitis_antibiotic_vancomycin_aureus |
| 95 | 101 | 95_titanium_titanium surface_titanium surfaces_surfaces |
| 96 | 101 | 96_osteochondral_osteochondral tissue_osteochondral defect_multilayered |
| 97 | 101 | 97_tricalcium phosphate_tricalcium_beta tricalcium phosphate_beta tricalcium |
| 98 | 99 | 98_osteoarthritis_knee_synovial_intra articular |
| 99 | 97 | 99_wnt_wnt signaling_signaling_canonical |
| 100 | 97 | 100_carbon_carbon nanotubes_nanotubes_nanotube |
| 101 | 96 | 101_study rats_impact_rats_histometric |
| 102 | 91 | 102_chitosan_nano hydroxyapatite_hydroxyapatite_nano |
| 103 | 87 | 103_diabetes_diabetes mellitus_mellitus_diabetic |
| 104 | 86 | 104_simvastatin_local_effect local_topical |
| 105 | 85 | 105_antibacterial_titanium_biofilm_aureus |
| 106 | 84 | 106_periodontitis_experimental periodontitis_inflammation_bone loss |
| 107 | 83 | 107_nerve_facial_peripheral_recovery |
| 108 | 82 | 108_biomaterials_biomaterials bone_biomaterials bone regeneration_biomaterial |
| 109 | 81 | 109_ct_tomography_computed tomography_computed |
| 110 | 80 | 110_dogs_defects dogs_periodontal_wall |
| 111 | 80 | 111_finite element_finite_finite element analysis_element analysis |
| 112 | 79 | 112_electromagnetic_fields_pulsed_field |
| 113 | 78 | 113_cleft_alveolar_secondary_unilateral |
| 114 | 77 | 114_single_tooth_supported_anterior |
| 115 | 75 | 115_femoral head_head_osteonecrosis_femoral |
| 116 | 75 | 116_cellulose_bacterial cellulose_bacterial_carboxymethyl |
| 117 | 74 | 117_alendronate_local_sodium_rats |
| 118 | 73 | 118_syndrome_marrow derived stem_bone marrow derived_marrow derived |
| 119 | 73 | 119_calvarial_calvarial defects_sized calvarial_critical sized calvarial |
| 120 | 72 | 120_composites_nanocomposites_composites bone_polymers |
| 121 | 72 | 121_interview_retraction_consensus_conference |
| 122 | 71 | 122_hypoxia_inducible_1alpha_hypoxic |
| 123 | 71 | 123_octacalcium phosphate_octacalcium_phosphate collagen_phosphate |
| 124 | 69 | 124_vitamin_25_deficiency_1alpha |
| 125 | 69 | 125_smooth_muscle_stem cell therapy_injured |
| 126 | 68 | 126_intrabony_intrabony defects_periodontal_periodontal intrabony |
| 127 | 68 | 127_orthodontic_anchorage_mini_stability |
| 128 | 67 | 128_bisphosphonate_oral_osseointegration dental implants_locally |
| 129 | 67 | 129_fibroblast growth factor_fibroblast growth_fibroblast_periodontal |
| 130 | 67 | 130_disc_degeneration_degenerated_degenerative |
| 131 | 66 | 131_zoledronic acid_zoledronic_acid_local |
| 132 | 66 | 132_dental stem_dentistry_dental stem cells_dental |
| 133 | 65 | 133_shock_wave_therapy_waves |
| 134 | 65 | 134_flap_fibula_free_flaps |
| 135 | 64 | 135_ceramic_ceramics_bioactive_polymer |
| 136 | 64 | 136_furcation_furcation defects_ii furcation_ii furcation defects |
| 137 | 64 | 137_hyaluronic acid_hyaluronic_hyaluronan_acid |
| 138 | 63 | 138_polarization_macrophage_macrophage polarization_macrophages |
| 139 | 63 | 139_mandibular_mandible_condyle_mandibular defects |
| 140 | 63 | 140_buccal_cone beam_dehiscence_cone |
| 141 | 62 | 141_piezoelectric_electrical_electrical stimulation_stimulation |
| 142 | 62 | 142_osteochondral_lesions_allograft_arthroscopic |
| 143 | 61 | 143_cartilage_cartilage regeneration_kartogenin_hydrogel |
| 144 | 60 | 144_engineering_tissue engineering_sheet_cell sheet |
| 145 | 60 | 145_lengthening_limb_intramedullary_deformity |
| 146 | 60 | 146_demineralized bone_demineralized_demineralized bone matrix_bone matrix |
| 147 | 59 | 147_maxillofacial_oral_oral surgery_jaw |
| 148 | 59 | 148_root_coverage_end_canal |
| 149 | 59 | 149_limb_regenerating_fgf_skeletal regeneration |
| 150 | 58 | 150_titanium mesh_mesh_customized_titanium |
| 151 | 58 | 151_dermal_template_foot_wounds |
| 152 | 56 | 152_distraction_distraction osteogenesis_alveolar_osteogenesis |
| 153 | 56 | 153_mandibular_spontaneous_mandible_spontaneous bone |
| 154 | 56 | 154_cementum_cementoblast_dentin_protein |
| 155 | 56 | 155_ankle_arthroscopic_joint_foot |
| 156 | 55 | 156_hair_follicle_dermal_papilla |
| 157 | 55 | 157_melatonin_porcine bone_topical_healing dental |
| 158 | 55 | 158_microrna_mir_21_nanoparticles |
| 159 | 55 | 159_osteosarcoma_metastasis_cancer_stat3 |
| 160 | 55 | 160_retained_supporting_mandibular_supported |
| 161 | 55 | 161_simvastatin_release_controlled release_loaded |
| 162 | 54 | 162_molar_autotransplantation_impacted_molars |
| 163 | 54 | 163_revision_components_component_cementless |
| 164 | 54 | 164_hydroxyapatite_osteogenic differentiation mesenchymal_differentiation mesenchymal stem_mesenchymal stem |
| 165 | 53 | 165_osseointegration_19_molecular_consensus |
| 166 | 53 | 166_repair regeneration_synovial_avascular_massive |
| 167 | 53 | 167_osteochondral_osteochondral defect_osteochondral tissue_hydrogel |
| 168 | 53 | 168_diabetes_diabetic_mellitus_type diabetes |
| 169 | 53 | 169_sponges_sponge_gelatin_collagen sponge |
| 170 | 52 | 170_calcium phosphate_coatings_calcium_phosphate |
| 171 | 52 | 171_cyst_cystic_jaw_odontogenic |
| 172 | 52 | 172_acute_residual_myeloid_minimal |
| 173 | 51 | 173_mesoporous silica_silica_mesoporous_nanoparticles |
| 174 | 51 | 174_mandibular_recombinant human bone_human bone morphogenetic_mandibular defect |
| 175 | 51 | 175_rnas_rna_long_non |
| 176 | 50 | 176_plga_plla_mg_loaded |
| 177 | 50 | 177_peptide_self assembling_assembling_self |
| 178 | 50 | 178_guided bone regeneration_guided bone_guided_horizontal |
| 179 | 49 | 179_dentin_demineralized_matrix_matrix bone |
| 180 | 48 | 180_mir_periodontal ligament_periodontal ligament stem_ligament stem |
| 181 | 48 | 181_plasma_pressure_cold_plasma treatment |
| 182 | 48 | 182_amputation_mouse_mammalian_limb |
| 183 | 48 | 183_polyetheretherketone_enhanced osseointegration_surface_antibacterial |
| 184 | 47 | 184_chitosan_thermosensitive_hydrogels_chitosan based |
| 185 | 47 | 185_heart_cardiac_myocardial_regenerating |
| 186 | 47 | 186_cartilage_cartilage regeneration_articular cartilage_articular |
| 187 | 46 | 187_component_arthroplasty_reverse_central |
| 188 | 46 | 188_red_genes_transcriptome_mammalian |
| 189 | 45 | 189_calcium sulfate_sulfate_calcium_mineralized collagen |
| 190 | 44 | 190_implant stability_stability_primary stability_primary |
| 191 | 44 | 191_degeneration_epithelium_damage_diabetic |
| 192 | 44 | 192_reconstitution_allogeneic_marrow transplantation_transplantation |
| 193 | 44 | 193_fibrosis_epithelial_epithelium_defective |
| 194 | 43 | 194_zinc_zn_alloy_ca |
| 195 | 42 | 195_epithelial_epithelial cells_postnatal_reconstitution |
| 196 | 42 | 196_photobiomodulation_review vivo_associated_size defects |
| 197 | 42 | 197_titanium mesh_mesh_alveolar ridge_alveolar |
| 198 | 41 | 198_temporomandibular_temporomandibular joint_joint_disc |
| 199 | 40 | 199_hedgehog_signalling_signaling_available |
| 200 | 40 | 200_umbilical cord_umbilical_cord_human umbilical cord |
| 201 | 40 | 201_marginal bone_marginal_bone level_bone loss |
| 202 | 40 | 202_calcium phosphate scaffolds_phosphate scaffolds_calcium phosphate_calcium |
| 203 | 40 | 203_atrophic_mandible_posterior_iliac |
| 204 | 40 | 204_retained_craniofacial_prostheses_orbital |
| 205 | 39 | 205_gelatin_release_microparticles_core |
| 206 | 39 | 206_fibrin_fibrin glue_glue_fibrinogen |
| 207 | 38 | 207_laser_low level_low level laser_level laser |
| 208 | 38 | 208_ovariectomized rats_ovariectomized_estrogen_titanium implants |
| 209 | 37 | 209_silver_antibacterial_nanoparticles_antimicrobial |
| 210 | 37 | 210_glycosaminoglycan_mineralized collagen_wistar rats_wistar |
| 211 | 37 | 211_heparin_heparan sulfate_conjugated_heparan |
| 212 | 37 | 212_failures_immediate implant_stage_immediate implant placement |
| 213 | 36 | 213_scaffolds tissue_scaffolds tissue engineering_scaffolds_engineering regenerative medicine |
| 214 | 36 | 214_mandibular_mandibular bone_mandibular defect_adipose |
| 215 | 36 | 215_furcation_class ii_ii_class |
| 216 | 36 | 216_bioprinting_hydrogel_laden_printing |
| 217 | 36 | 217_dentistry_oral_tooth_dental tissue |
| 218 | 36 | 218_granulocyte colony stimulating_granulocyte colony_colony stimulating factor_colony stimulating |
| 219 | 35 | 219_ear_middle_cell regeneration_hair |
| 220 | 35 | 220_bone marrow stromal_marrow stromal_marrow stromal cells_stromal |
| 221 | 35 | 221_silicate_bioceramics_silica_calcium silicate |
| 222 | 35 | 222_cartilage_cartilage regeneration_pluripotent stem_pluripotent |
| 223 | 35 | 223_angiogenesis_angiogenesis bone_angiogenesis osteogenesis_osteogenesis angiogenesis |
| 224 | 35 | 224_polycaprolactone_caprolactone_hydroxyapatite_poly epsilon caprolactone |
| 225 | 34 | 225_amniotic membrane_amniotic_amnion_membrane |
| 226 | 34 | 226_osteotomy_tibial_high_medial |
| 227 | 34 | 227_musculoskeletal_musculoskeletal tissue_medicine_regenerative |
| 228 | 34 | 228_liver_macrophages_macrophage_hepatic |
| 229 | 33 | 229_bone implant_implant contact_bone implant contact_contact |
| 230 | 33 | 230_disc_degeneration_genetic_organ |
| 231 | 33 | 231_osteomyelitis_chronic_treatment chronic_antibiotic |
| 232 | 33 | 232_extracellular matrix_extracellular_matrix_derived extracellular matrix |
| 233 | 33 | 233_infection_related_fracture_fractures |
| 234 | 32 | 234_odontogenic_mandible_central_giant |
| 235 | 32 | 235_organ_making_regenerative medicine_regenerative |
| 236 | 32 | 236_union_unions_non union_non |
| 237 | 31 | 237_ischemia_limb_mononuclear cell_mononuclear |
| 238 | 31 | 238_removal_water_adsorption_additively manufactured |
| 239 | 31 | 239_tantalum_trabecular_porous_metal |
| 240 | 31 | 240_heart_failure_stem cell therapy_cell therapy |
| 241 | 31 | 241_bioprinting_cartilage_printing_3d |
| 242 | 30 | 242_xenogeneic_xenografts_xenograft_xenogeneic bone |
| 243 | 30 | 243_beta tricalcium phosphate_beta tricalcium_tricalcium phosphate_tricalcium |
| 244 | 30 | 244_osteochondral_endochondral_osteochondral defect_defects rabbits |
| 245 | 30 | 245_alveolar bone_alveolar_alveolar bone regeneration_human alveolar |
| 246 | 30 | 246_mandibular distraction_mandibular distraction osteogenesis_distraction_distraction osteogenesis |
| 247 | 29 | 247_integrin_ligands_alpha_beta1 |
| 248 | 29 | 248_equine_synovial_fluid_tendon |
| 249 | 29 | 249_implant osseointegration_systemic_osseointegration_drugs |
| 250 | 29 | 250_macrophages_monocyte_macrophage_monocytes |
| 251 | 28 | 251_infrabony_intrabony_infrabony defects_bio oss |
| 252 | 28 | 252_wnt_wnt signaling_beta catenin_catenin |
| 253 | 28 | 253_membranes_guided tissue regeneration_guided tissue_periodontal |
| 254 | 28 | 254_fracture_fracture healing_fractures_healing |
| 255 | 28 | 255_bisphosphonate_osteonecrosis_related osteonecrosis_osteonecrosis jaw |
| 256 | 27 | 256_pluripotent stem cells_pluripotent stem_pluripotent_induced pluripotent stem |
| 257 | 27 | 257_endodontic_guided tissue regeneration_guided tissue_lesions |
| 258 | 27 | 258_lactic_poly lactic_lactic acid_membranes |
| 259 | 27 | 259_fibular_children_resection_vascularized |
| 260 | 27 | 260_collagen membranes_membranes_porcine_collagen |
| 261 | 27 | 261_gold_nanoparticles_nanoparticles bone_nanoparticle |
| 262 | 27 | 262_umbilical cord_umbilical_cord_human umbilical cord |
| 263 | 27 | 263_surface modifications_surfaces_modifications_dental implants |
| 264 | 27 | 264_intrabony_intrabony defects_treatment intrabony_treatment intrabony defects |
| 265 | 27 | 265_hip_hydroxyapatite coated_hip arthroplasty_total hip |
| 266 | 26 | 266_phenotype_conditioned medium_stem cell differentiation_cell conditioned medium |
| 267 | 26 | 267_recombinant human bone_human bone morphogenetic_bone morphogenetic protein_morphogenetic protein |
| 268 | 26 | 268_osseointegrated_osseointegrated implants_retained_prosthesis |
| 269 | 26 | 269_periodontal tissue_periodontal tissue regeneration_adipose_adipose derived |
| 270 | 26 | 270_cell binding peptide_cell binding_binding peptide_bovine derived |
| 271 | 26 | 271_lactic_poly lactic_poly_lactic acid |
| 272 | 26 | 272_nanotubes_tio_nanotube_tio2 |
| 273 | 25 | 273_autophagy_differentiation bone marrow_impairment_differentiation bone |
| 274 | 25 | 274_acid scaffolds_polylactic acid_printed_poly lactic |
| 275 | 25 | 275_gingival_flap_advanced_acellular dermal matrix |
| 276 | 25 | 276_tooth_teeth_necrotic_regenerative potential |
| 277 | 24 | 277_immediate loading_loading_immediate_implants immediate |
| 278 | 24 | 278_notch_notch signaling_signaling_signaling bone |
| 279 | 24 | 279_mineralized collagen_collagen_collagen based_mineralized |
| 280 | 24 | 280_magnetic_static_field_fields |
| 281 | 24 | 281_black_phosphorus_nanosheets_nanomaterials |
| 282 | 23 | 282_polydopamine_mussel inspired_mussel_inspired |
| 283 | 23 | 283_fractures_plate_proximal_tibia |
| 284 | 23 | 284_esthetic_zone_esthetic zone_immediate |
| 285 | 23 | 285_membrane_guided bone_guided bone regeneration_titanium |
| 286 | 23 | 286_ridge_expansion_split_maxilla |
| 287 | 23 | 287_oxygen_calvarial_calvarial defects_diabetes |
| 288 | 22 | 288_15_agonist_selective_inhibitors |
| 289 | 22 | 289_phosphate scaffolds_calcium phosphate scaffolds_calcium phosphate_3d |
| 290 | 22 | 290_hypoxia_hypoxic_preconditioning_deprivation |
| 291 | 22 | 291_cell therapy_cardiac_therapy_cell based |
| 292 | 22 | 292_extraction_extraction sites_immediate_sites |
| 293 | 22 | 293_endothelial_endothelial cells_derived endothelial_endothelial progenitor cells |
| 294 | 22 | 294_cyst_resection_subperiosteal_fibular |
| 295 | 22 | 295_marrow derived cells_cells bone marrow_plasticity_bone marrow cells |
| 296 | 22 | 296_diabetic_wound healing_wound_foot |
| 297 | 21 | 297_erythropoietin_bone formation rabbit_formation rabbit_osteonecrosis femoral head |
| 298 | 21 | 298_histone_inhibitor_methylation_inhibition |
| 299 | 21 | 299_cell therapy bone_society_therapy bone_cell therapy |
| 300 | 21 | 300_fish_marine_skin_collagen |
| 301 | 21 | 301_terminal_peptides_proliferation human_peptide |
| 302 | 21 | 302_recombinant human bone_human bone morphogenetic_recombinant human_alveolar |
| 303 | 21 | 303_osteogenic differentiation mesenchymal_human mesenchymal stem_surfaces_microfluidic |
| 304 | 21 | 304_runx2_transcription factor_cbfa1_mapk signaling |
| 305 | 21 | 305_graphene oxide_graphene_oxide_chitosan |
| 306 | 21 | 306_oral_diagnosis_mid_spectroscopy |
| 307 | 20 | 307_sclerostin_antibody_systemic_inhibition |
| 308 | 20 | 308_exfoliated_deciduous_deciduous teeth_stem cells human |
| 309 | 20 | 309_nanofiber scaffold_nanofiber_nanofibers_adhesion |
| 310 | 20 | 310_etched_acid etched_sandblasted_acid |
| 311 | 20 | 311_periapical_surgery_regeneration case report_guided tissue regeneration |
| 312 | 20 | 312_membranes_nanofibrous_membranes guided bone_membranes guided |
| 313 | 20 | 313_simulated_space_duration_assays |
| 314 | 20 | 314_orbital_floor_submucosa_reconstruction |
| 315 | 20 | 315_infection_staphylococcus_staphylococcus aureus_biofilm |
| 316 | 20 | 316_iliac_iliac crest_crest_donor site |
| 317 | 20 | 317_nasal_atelocollagen_marrow derived stromal_using bone marrow |
| 318 | 20 | 318_chitosan_guided_guided bone_membranes |
| 319 | 20 | 319_cranial_hydroxyapatite_25_custom |
| 320 | 19 | 320_osteochondral_osteochondral tissue_regeneration tissue engineering_regeneration tissue |
| 321 | 19 | 321_platform_dimensional finite element_dimensional finite_finite element analysis |
| 322 | 19 | 322_musculoskeletal_adult mesenchymal stem_adult mesenchymal_musculoskeletal tissue |
| 323 | 19 | 323_cartilage_morphogenetic proteins_bone morphogenetic proteins_articular cartilage |
| 324 | 19 | 324_imaging_vessels_blood vessels_angiogenesis |
| 325 | 19 | 325_bone marrow aspirate_marrow aspirate_aspirate_marrow aspirate concentrate |
| 326 | 19 | 326_chitosan_periodontal_chitosan based_periodontal tissue |
| 327 | 19 | 327_spectroscopy_laser_infrared_bone morphogenetic proteins |
| 328 | 19 | 328_heterotopic ossification_heterotopic_mtor signaling_placebo controlled |
| 329 | 19 | 329_umbilical cord blood_cord blood_umbilical cord_umbilical |
| 330 | 19 | 330_radius_distal_fractures_stabilized |
| 331 | 19 | 331_amniotic fluid_amniotic_fluid_human amniotic |
| 332 | 19 | 332_alcohol_exposure_chronic_tnf |
| 333 | 19 | 333_implant failure_failure_early implant_factors |
| 334 | 19 | 334_icariin_stimulates osteogenic_tissue engineering effect_engineering effect |
| 335 | 18 | 335_air_guinea_highly porous_highly |
| 336 | 18 | 336_nanotechnology_regenerative medicine_medicine_regenerative |
| 337 | 18 | 337_pcl_tcp_beta tcp_scaffolds bone tissue |
| 338 | 18 | 338_type diabetes mellitus_type diabetes_stem cell sheet_diabetes mellitus |
| 339 | 18 | 339_thermal_temperature_drilling_heat |
| 340 | 18 | 340_failure_female_damaged_marrow stromal cells |
| 341 | 18 | 341_lactic_poly lactic_poly_lactic glycolic acid |
| 342 | 18 | 342_mussel_adhesive_mussel inspired_inspired |
| 343 | 18 | 343_spinal_cord_injury_bone mesenchymal stem |
| 344 | 18 | 344_peptide_peptides_osteogenic growth peptide_growth peptide |
| 345 | 18 | 345_nanofibrous_nanofibrous scaffolds_nanofibrous scaffold_fibrous |
| 346 | 17 | 346_bone augmentation_augmentation_vertical bone augmentation_vertical bone |
| 347 | 17 | 347_papilla_inter_syndrome_crestal |
| 348 | 17 | 348_fluid_peri_peri implant_1beta |
| 349 | 17 | 349_teriparatide_jaw_osseous regeneration_osteonecrosis jaw |
| 350 | 17 | 350_posterior_short_areas_posterior maxilla |
| 351 | 17 | 351_regeneration peri_peri implant_peri_particulate bone |
| 352 | 17 | 352_membrane technique_diaphyseal_technique_membrane |
| 353 | 17 | 353_laser_surface modifications_biomechanical_titanium implants |
| 354 | 17 | 354_endochondral_endochondral ossification_ossification_developmental |
| 355 | 17 | 355_terminal_fracture healing_activation_fracture |
| 356 | 17 | 356_flapless_implant surgery_surgery_survival rates |
| 357 | 17 | 357_maxillofacial_dentistry_maxillofacial surgery_oral maxillofacial |
| 358 | 16 | 358_methylation_adipose derived stem_histone_dna |
| 359 | 16 | 359_calvarial bone defects_calvarial defect model_bone regeneration rat_calvarial |
| 360 | 16 | 360_schwann_schwann cells_transdifferentiation_cell like |
| 361 | 16 | 361_electrical_electrical stimulation_stimulation_electric |
| 362 | 15 | 362_microspheres_microsphere_bone regeneration porous_regeneration porous |
| 363 | 15 | 363_palatal_orthodontic_anchorage_success rate |
| 364 | 15 | 364_bone defect_bone defect model_engineering_segmental |
| 365 | 15 | 365_hydroxyapatite beta_calvarial defects_hydroxyapatite_calvaria |
| 366 | 15 | 366_blinded_removal torque_bone implant_implant stability |
| 367 | 15 | 367_medication_related osteonecrosis_related osteonecrosis jaw_osteonecrosis jaw |
| 368 | 15 | 368_cartilage_imaging_multimodal_bioengineered |
| 369 | 15 | 369_antibiotic_implant surgery_implantology_osseointegrated implants |
| 370 | 15 | 370_polyurethane_biodegradable_ester_regenerative medicine |
| 371 | 15 | 371_lactide_tricalcium phosphate_tricalcium_poly |
